# Supplementary material for: Multicomponent assembly of luminescent hybrid materials of ZnO-lanthanide polymer complex functionalized SBA-15 mesoporous host by chemical bonds
Source: Royal Society of Chemistry journal article supplement (doi:10.1039/c2ra21605a), 2012-01-01
Supplement: c2ra21605a.pdf [file c2ra21605a.pdf]

Supporting information

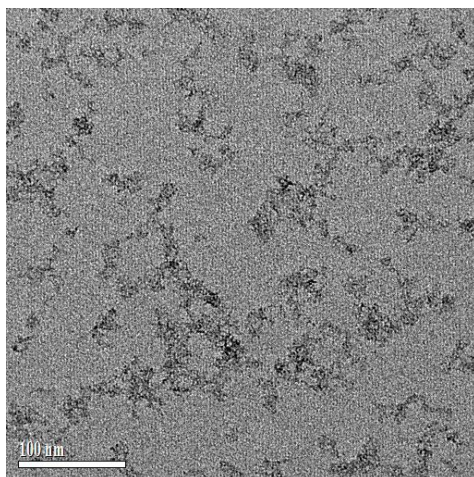

**Figure S1** The selected TEM image of ZnO-MAA nanoparticles

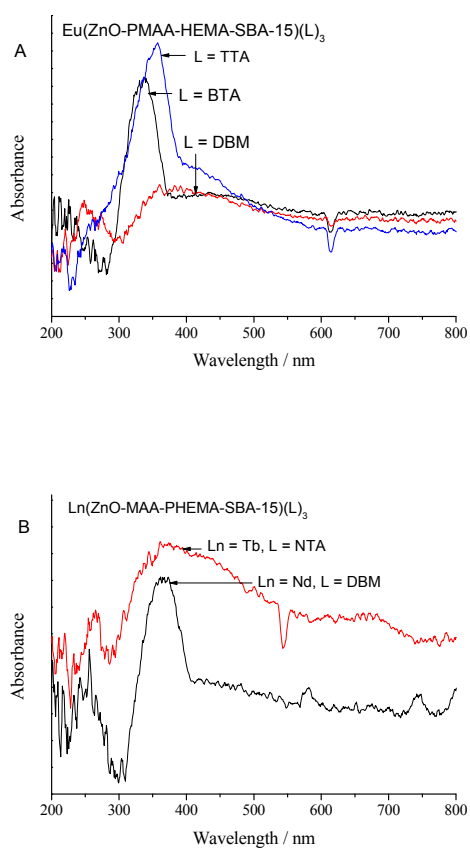

**Figure S2** The ultraviolet-visible diffuse reflectance spectra of hybrid mesoporous materials: (A) europium systems, (B) terbium and neodymium system
